# Supplementary material for: Highly specific oxidative damage of double-strand DNA by copper aminoglycosides
Source: Royal Society of Chemistry journal article supplement (doi:10.1039/b103789g), 2001-01-01

**SUPPLEMENTARY MATERIAL FOR**

Highly Specific Oxidative Damage of Double-Strand DNA by Copper Aminoglycosides.

Anjali Patwardhan and J. A. Cowan.

# **Experimental Section**

*HPLC Analysis.* In a typical reaction, 100 g of plasmid DNA (pT7-7) was treated with 0.5 mM of **1** or **2** and a ten-fold molar excess of H2O2 or ascorbate in 10 mM HEPES (or Tris-HCl), pH 7.4 at 37oC. After incubation for an hour the reaction mixture was loaded onto a Pharmacia Biotech C-18 Sephasil Peptide (5 M, ST 4.6/250) reverse phase column equilibrated with 0.1 M NH4OAc, pH 6.8 (solvent system A). Products were eluted with a gradient profile (0-5min, 100% A; 5-30min, 0-2% B in A; 30-40min, 2-10% B in A; 40-50min, 10% B in A; 50-60min, 10-25% B in A) where system B was acetonitrile. The same reaction mixture was heated at 85 oC for 20 min, loaded onto the reverse phase column, and the elution profile was recorded. Independent control runs using authentic materials confirmed the identity of the products of the cleavage reaction. Known concentrations of bases (Sigma Chem. Co) were loaded on to the reverse phase column and the corresponding peak areas were measured. A calibration plot of peak areas versus concentration was used to calculate the concentration of bases released during cleavage reactions. 5-MF was isolated and characterized by mass spectrometry (base peak at 96 amu) and UV-vis spectroscopy (with max ~ 260 nm).

*Thiobarbituric acid assay.* The standard thiobarbituric acid (TBA) assay was carried out by heating (95 oC) the reaction mixture in 0.6% TBA for 20 min. The resulting pink colored solution exhibited max ~ 532 nm corresponding to the adduct of TBA and malondialdehyde. A calibration curve was generated using 1 – 10 M malondialdehyde as a standard.

*Quantitation of the C-1’ H pathway*. The peak corresponding to 5-MF was collected and its absorbance measured. The concentration of 5-MF was obtained by using the published extinction coefficient =1400 M-1cm-1 (E. Shaw, *J. Am. Chem. Soc.*, 1946, **68**, 2510-2513). For every mole of base released, 1 mole of 5-MF is generated by the C-1’ H abstraction. The concentration of base responsible for the C-1’ H pathway was therefore determined.


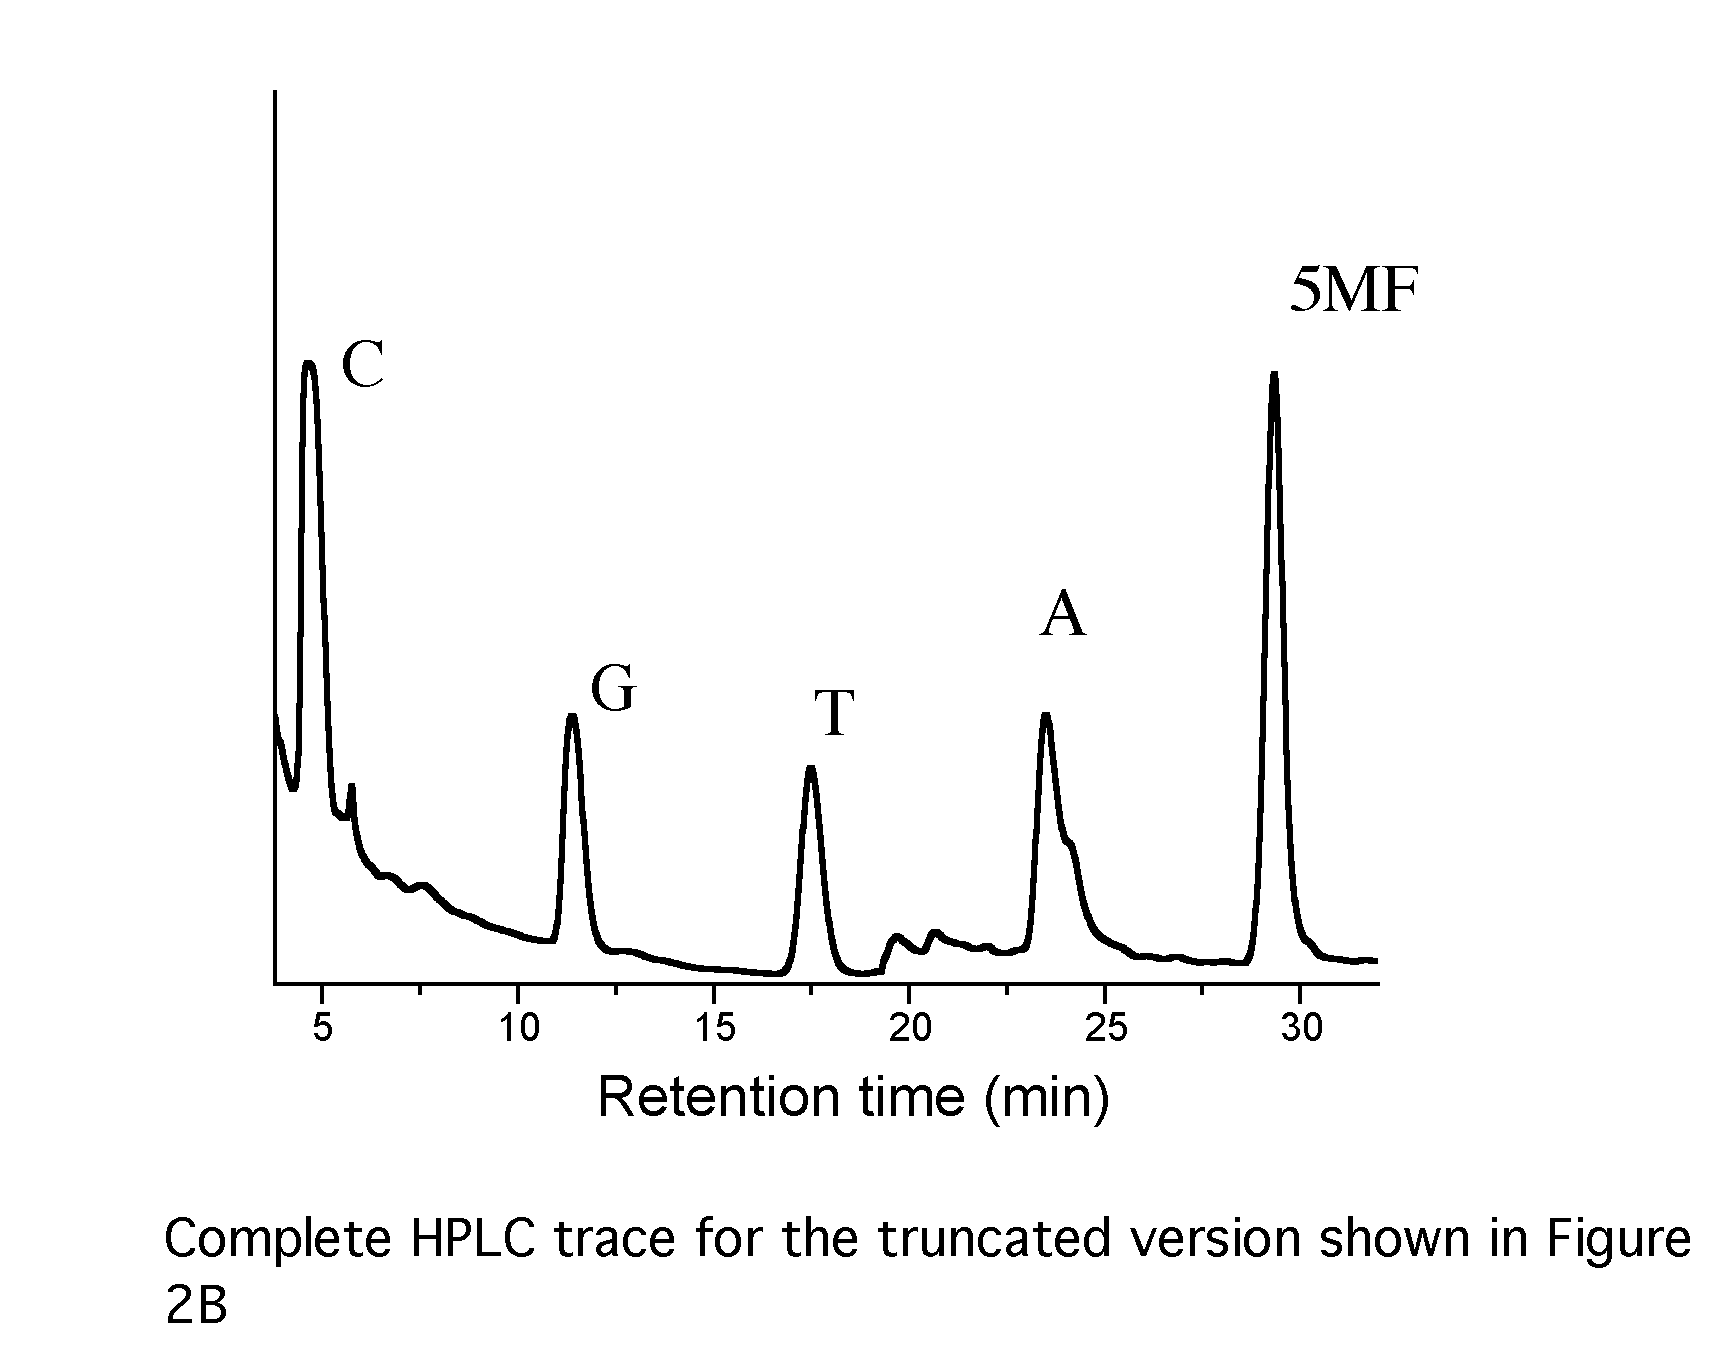

Supplement: b103789g.doc [file b103789g.doc]
